# Supplementary material for: CNT-network modified Ni nanostructured arrays for high performance non-enzymatic glucose sensors
Source: Royal Society of Chemistry journal article supplement (doi:10.1039/c1ra00280e), 2011-01-01
Supplement: c1ra00280e.pdf [file c1ra00280e.pdf]

## Supplementary Information

### CNTs-Network Modified Ni Nanowall Arrays for High Performance Non-enzymatic Glucose Sensors

Jianhui Zhu,<sup>a</sup> Jian Jiang,<sup>a</sup> Jinping Liu,<sup>a</sup> Ruimin Ding,<sup>a</sup> Yuanyuan Li,<sup>b</sup> Hao Ding,<sup>a</sup> Yamin Feng,<sup>a</sup> Guangming Wei,<sup>a</sup> and Xintang Huang\*<sup>a</sup>

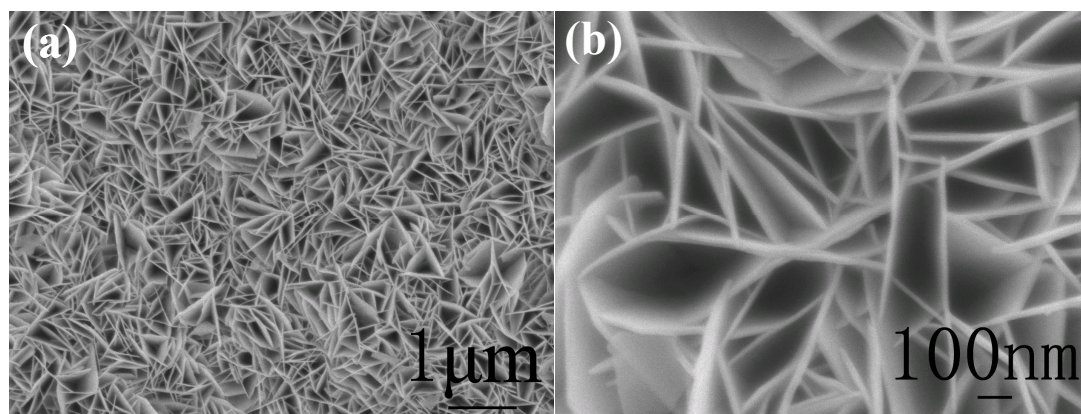

Fig. S1. (a) Low, (b) High resolution SEM images of Ni<sub>2</sub>(OH)<sub>2</sub>CO<sub>3</sub> Nanowall arrays.

---

\* To whom correspondence should be addressed: Fax +86-027-67861185. E-mail:

[jhzhu@phy.ccnu.edu.cn](mailto:jhzhu@phy.ccnu.edu.cn) (J.H. Zhu); [xthuang@phy.ccnu.edu.cn](mailto:xthuang@phy.ccnu.edu.cn) (X.T. Huang).

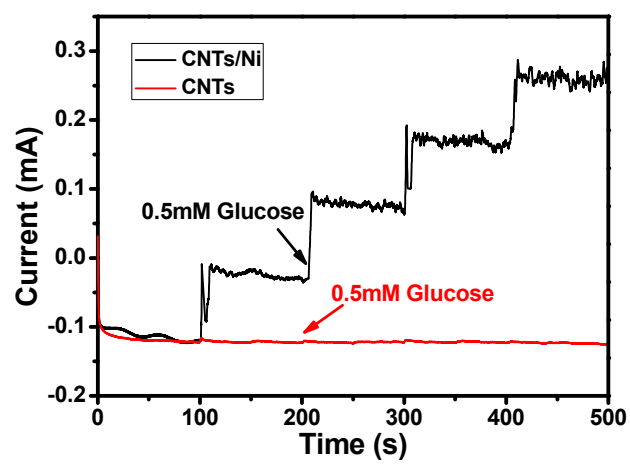

Fig. S2. Chronoamperometric current responses of CNTs and CNTs/Ni electrodes for successive addition of 0.5 mM glucose to stirred 0.5 M NaOH solution at 0.55V.
